# Supplementary material for: Gene mutations and clinical features of pediatric sitosterolemia
Source: Research Square preprint supplement (doi:10.21203/rs.3.rs-3779831/v1), 2023-12-23
Supplement: Supplementary file 1 [file 729b2a9cc8b4f723334942c9.docx]

**Table 1.** Summary of clinical data of 26 patients

| No. | Gender/Diagnosed age | Onset age | Xanthomas | Arthralgia | GR | Others | TC  (mmol/L) | LDL-C  (mmol/L) | Sitosterol  (µmol/L) | Campesterol  (µmol/L) | Cardiac ultrasound | Artery ultrasound | Gene | Variant/amino acid | Variant type |
| --- | --- | --- | --- | --- | --- | --- | --- | --- | --- | --- | --- | --- | --- | --- | --- |
| 1 | F/6y | 6y | + | - | + | Hb 108 g/L, Lpa 1020 mg/L | 11.03 | 9.07 |  |  | ASD (2.2 mm) | - | *ABCG*5 | c.1166G>A (p.Arg389His)  c.1336C>T (p.Arg446*) | Missense  Nonsense |
| 3 | M/12y | 7y | + | + | - |  | 4.90 | 3.47 | 311.21 | 195.72 | - | Thickening, formation of plaques | *ABCG*5 | c.1464-1G>C  c.1418C>G (p.Pro434Arg) | Splicing  Missense |
| 4 | F/9y1m | 6y | - | - | - | Hb 113 g/L | 7.64 | 4.65 | 109.53 | 90.77 | - | - | *ABCG*5 | c.1336C>T (p.Arg446*)  c.1528C>A (p.His510Asn) | Nonsense  Missense |
| 7 | M/10y4m | 9y | + | + | - | Lpa 345 mg/L | 15.88 | 10.59 |  |  | AR | Local thickening | *ABCG*5 | c.1166G>A (p.Arg389His) | Missense |
| 8 | M/6y | 6y | + | + | - |  | 6.89 | 5.04 |  |  | AR | Local thickening | *ABCG*5 | c.1336C>T (p.Arg446*)  c.1166G>A (p.Arg389His) | Nonsense  Missense |
| 9 | F/4y8m | 4y8m | - | - | + |  | 6.25 | 4.38 | 633.64 | 673 | - | - | *ABCG*5 | c.1336C>T (p.Arg446*)  c.1166G>A (p.Arg389His) | Nonsense  Missense |
| 10 | M/7y9m | 7y3m | + | - | - |  | 12.38 | 10.24 |  |  | - | Local thickening | *ABCG*5 | c.751C>T (p.Gln251*) | Nonsense |
| 11 | M/1y | 5d | + | - | - | Plt 90×109/L | 11.98 | 9.00 |  |  | - | - | *ABCG*5 | c.1166G>A (p.Arg389His)  c.1336C>T (p.Arg446*) | Missense  Nonsense |
| 12 | F/1y9m | 1y3m | + | + | - |  | 27.15 | 15.85 | 156.30 | 147.52 | - | - | *ABCG*5 | c.1166G>A (p.Arg389His)  c.27C>T (p.Pro9Pro) | Missense Synonymous |
| 13 | F/5y11m | 1y | - | - | + | High palatal arch, low ear position | 6.20 | 4.50 | 327.61 | 162.42 | - | - | *ABCG*5 | c.1166G>A (p.Arg389His)  c.1336C>T (p.Arg446*) | Missense  Nonsense |
| 14 | F/3y | 1y | + | - | - |  | 13.28 | 9.91 |  |  | - | - | *ABCG*5 | c.751C>T (p.Gln251*)  c.1336C>T (p. Arg446*) | Nonsense  Nonsense |
| 18 | M/5y11m | 3y | + | - | - |  | 18.10 | 14.70 | 867.6 | 963.17 | - | - | *ABCG*5 | c.1166G>A(p.Arg389His)  c.794T>C (p.Ile265Thr) | Missense  Missense |
| 21 | M/5y | 3y | + | - | - |  | 11.00 |  | 1001.5 |  | - | - | *ABCG*5 | c.1217G>A (p. Arg406Gln)  c.1166G>A (p.Arg389His) | Missense  Missense |
| 24 | F/5y11m | 4y2m | - | - | - |  | 18.10 | 14.70 | 649.64 | 689 | - | - | *ABCG*5 | c.751C＞T (p.Gln251*) | Nonsense |
| 26 | M/11y | 4y | + | + | - | Hb 109 g/L | 14.65 | 10.25 |  |  | - | Local thickening | *ABCG*5 | c.1166G>A (p.Arg389His)  c.751C>T (p.Gln251*) | Missense  Nonsense |
| 25 | M/1y | 1y | - | - | - | Malnutrition, hypercholesterolemia, small penis, SGA | 10.09 | 7.55 | 1026.41 | 633.4 | - | - | *ABCG8* and  *ABCG5* | c.1189C>T(p.Gln397Ter277)  c.1240C>G (p.Leu414Val)  c.63+217C>T  and c.904+5G>C | Nonsense  Missense  Splicing  Splicing |
| 2 | F/7y | 6y3m | + | + | - | Pubertas praecox | 12.55 | 9.88 | 162.55 | 86.19 | PDA (2.6 mm) | - | *ABCG*8 | c.600C>G (p.Cys200Trp)  c.788G>A (p.Arg263Gln) | Missense  Missense |
| 5 | M/5y | 4y | + | - | - |  | 12.39 | 7.62 |  |  | - | - | *ABCG*8 | c.694+5G>C  c.788G>A (p.Arg263Gln) | Splicing  Missense |
| 6 | M/7y | 7y | - | - | + |  | 11.74 | 8.26 |  |  | - | - | *ABCG*8 | c.323-1G>C  c.686G>A (p.Trp229*) | Splicing  Nonsense |
| 15 | M/8y | 8y | - | - | - |  | 11.70 | 8.75 |  |  | - | - | *ABCG*8 | c.1285A>G (p.Met429Val)  c.1499_1500 insTCTCGGGGGA (p.Glu500AspPheSer*105) | Missense  Frameshift |
| 17 | F/5y | 1y6m | + | - | - |  | 27.04 | 9.29 | 150.01 | 230.88 | - | - | *ABCG*8 | c.683T>C (p.Leu228Pro)  c.694+5G>C | Missense  Splicing |
| 20 | F/1y4m | 10 m | + | - | - |  | 22.74 | 17.29 | 260.42 | 178.08 | - | Local thickening | *ABCG*8 | c.694+5G>C  c.964+2T>G | Splicing  Splicing |
| 22 | F/9y7m | 6y6m | + | - | - | Muscle soreness | 12.42 | 9.93 |  |  | - | - | *ABCG*8 | c.1256-1257delinsAA (p.ILE419Lys) | Missense |
| 23 | F/5y | 3y | + | + | - |  | 18.27 | 15.34 |  |  | - | - | *ABCG*8 | c.788G>A (p.Arg263Gln) | Missense |
| 16 | F/5y | 3y | + | - | + |  |  |  | 4753.28 | 816.38 | - | - |  |  |  |
| 19 | M/10y | 9y6m | + | - | - | Hb 111 g/L | 12.00 | 11.00 | >400.00 | 67.07 | - | - |  |  |  |

M, male; F, female; Y, year; M, month; D, day; GR, growth retardation; Hb, hemoglobin; Plt, platelet; Lpa, lipoprotein a; ASD, atrial septal defect; AR, aortic regurgitation; PDA, patent foramen ovale.
